# Supplementary material for: RNALocate v2.0: an updated resource for RNA subcellular localization with increased coverage and annotation
Source: PubMed Central journal article supplement — Nucleic Acids Res. 2021 Sep 22;50(D1):D333–9. doi: 10.1093/nar/gkab825 (PMC8728251; doi:10.1093/nar/gkab825), 2021-09-22
Supplement: gkab825_supplemental_file.pdf [file gkab825_supplemental_file.pdf]

## SUPPLEMENTARY DATA

Supplementary Figure S1. The result of searching from RNA-seq dataset. **(A)** Subcellular localization of chromatin, cytoplasm and nucleoplasm in different conditions. **(B)** Different subcellular localizations in individual cell type. **(C)** Subcellular localizations revealed by APEX-Seq. **(D)** Single subcellular localization (Nucleus) in different conditions. **(E)** Subcellular localizations of cytoplasm and nucleus in different cell lines.

### A Subcellular localization (chromatin, cytoplasm and nucleoplasm) in different conditions

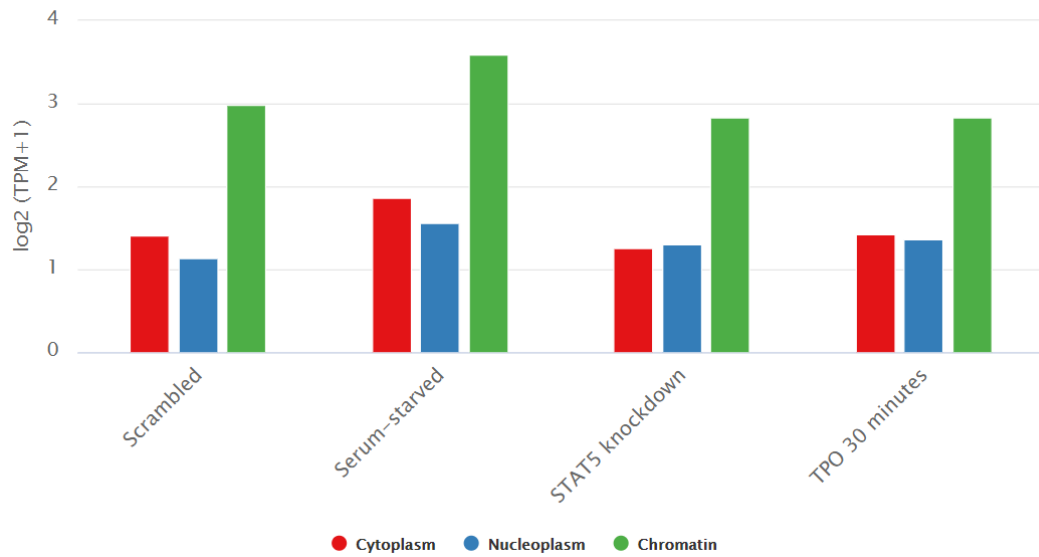

| Condition       | Localization | Relative ratio 1 | Localization | Condition       | Relative ratio 2 |
|-----------------|--------------|------------------|--------------|-----------------|------------------|
| Scrambled       | Cytoplasm    | 0.1697           | Cytoplasm    | Scrambled       | 0.8980           |
|                 | Nucleoplasm  | 0.1232           |              | Serum-starved   | 1.4361           |
|                 | Chromatin    | 0.7072           |              | STAT5 knockdown | 0.7529           |
|                 |              | TPO 30 minutes   |              | 0.9131          |                  |
| Serum-starved   | Cytoplasm    | 0.1698           | Nucleoplasm  | Scrambled       | 0.7773           |
|                 | Nucleoplasm  | 0.1242           |              | Serum-starved   | 1.2528           |
|                 | Chromatin    | 0.7060           |              | STAT5 knockdown | 0.9465           |
|                 |              | TPO 30 minutes   |              | 1.0234          |                  |
| STAT5 knockdown | Cytoplasm    | 0.1543           | Chromatin    | Scrambled       | 0.9159           |
|                 | Nucleoplasm  | 0.1627           |              | Serum-starved   | 1.4616           |
|                 | Chromatin    | 0.6829           |              | STAT5 knockdown | 0.8153           |
|                 |              | TPO 30 minutes   |              | 0.8071          |                  |
| TPO 30 minutes  | Cytoplasm    | 0.1801           |              |                 |                  |
|                 | Nucleoplasm  | 0.1693           |              |                 |                  |
|                 | Chromatin    | 0.6506           |              |                 |                  |

### B Different subcellular localizations in individual cell type

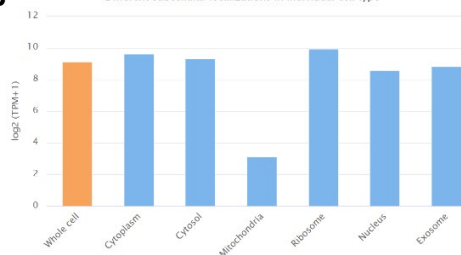

| Localization | Relative ratio |
|--------------|----------------|
| Cytoplasm    | 1.43           |
| Cytosol      | 1.17           |
| Mitochondria | 0.01           |
| Ribosome     | 1.80           |
| Nucleus      | 0.70           |
| Exosome      | 0.82           |

**C**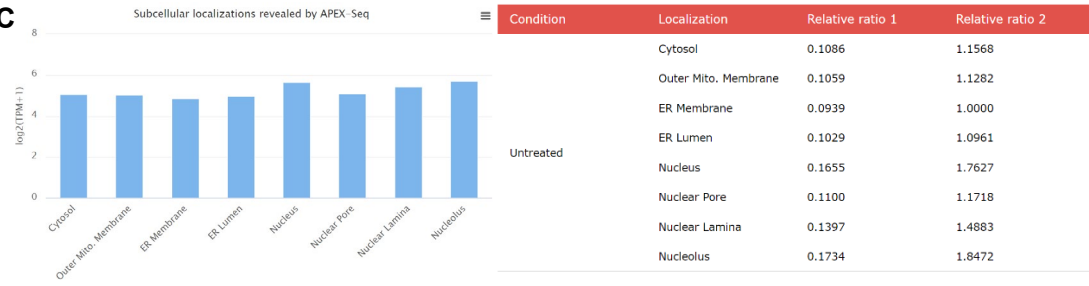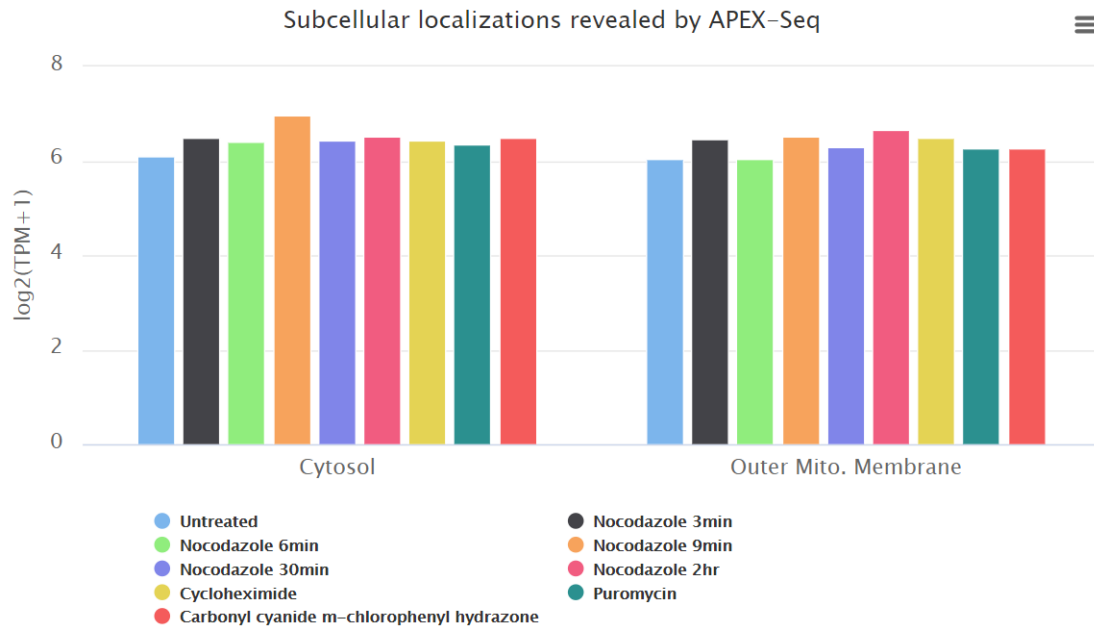

| Localization         | Condition                                 | Relative ratio 3 |
|----------------------|-------------------------------------------|------------------|
| Cytosol              | Untreated                                 | 1.00             |
|                      | Nocodazole 3min                           | 1.30             |
|                      | Nocodazole 6min                           | 1.23             |
|                      | Nocodazole 9min                           | 1.84             |
|                      | Nocodazole 30min                          | 1.27             |
|                      | Nocodazole 2hr                            | 1.35             |
|                      | Cycloheximide                             | 1.25             |
|                      | Puromycin                                 | 1.20             |
|                      | Carbonyl cyanide m-chlorophenyl hydrazone | 1.31             |
| Outer Mito. Membrane | Untreated                                 | 1.00             |
|                      | Nocodazole 3min                           | 1.34             |
|                      | Nocodazole 6min                           | 1.00             |
|                      | Nocodazole 9min                           | 1.37             |
|                      | Nocodazole 30min                          | 1.18             |
|                      | Nocodazole 2hr                            | 1.53             |
|                      | Cycloheximide                             | 1.37             |
|                      | Puromycin                                 | 1.16             |
|                      | Carbonyl cyanide m-chlorophenyl hydrazone | 1.17             |

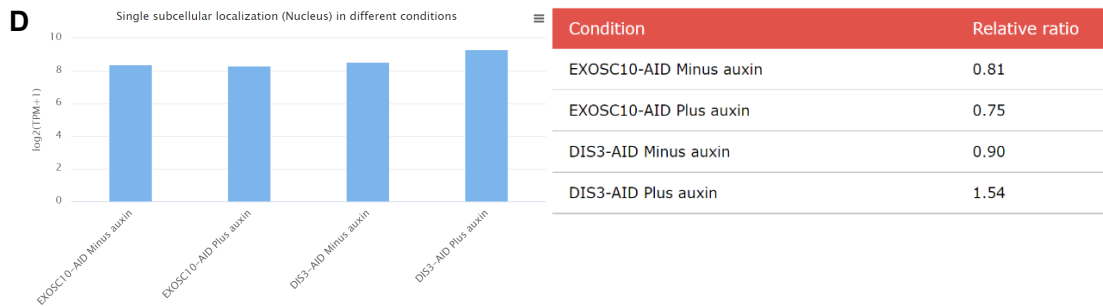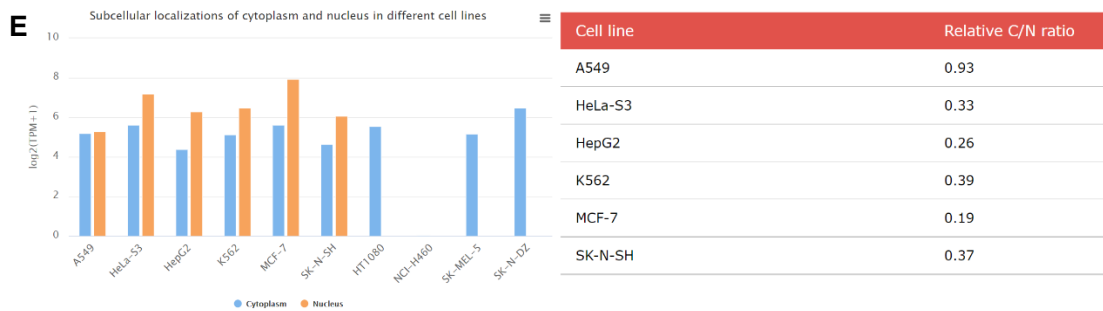

Supplementary Table S1. The number of samples and datasets in 15 subcellular locations.

| <b>Subcellular Location</b> | <b>Number of Samples</b> | <b>Number of Datasets</b> |
|-----------------------------|--------------------------|---------------------------|
| Chromatin                   | 10                       | 2                         |
| Cytoplasm                   | 38                       | 16                        |
| Cytosol                     | 44                       | 7                         |
| ER Lumen                    | 4                        | 1                         |
| ER Membrane                 | 4                        | 1                         |
| Exosome                     | 2                        | 1                         |
| Mitochondria                | 2                        | 1                         |
| Mitochondrial Matrix        | 9                        | 1                         |
| Nuclear Lamina              | 4                        | 1                         |
| Nuclear Pore                | 4                        | 1                         |
| Nucleolus                   | 6                        | 2                         |
| Nucleoplasm                 | 10                       | 2                         |
| Nucleus                     | 34                       | 12                        |
| Outer Mito. Membrane        | 30                       | 1                         |
| Ribosome                    | 2                        | 1                         |

Supplementary Table S2. The types of 'other RNAs' and 'other localizations' in Figure 3A.

| <b>Other RNAs</b>    | <b>Subcellular localization</b>    |
|----------------------|------------------------------------|
| antisense RNA        | Axon                               |
| cnRNA                | Cell body                          |
| csRNA                | Centrosome                         |
| lincRNA              | Chloroplast                        |
| ncRNA                | Cytoplasmic stress granule         |
| other                | Dendrite                           |
| piRNA                | Endosome                           |
| processed_transcript | Extracellular vesicle              |
| pseudo               | Germ plasm                         |
| rRNA                 | Germinal vesicle                   |
| scRNA                | Interphase nucleus of blastomere   |
| snRNA                | Lysosome                           |
| tRNA                 | Mitochondrion                      |
| unclassified RNA     | Monosome                           |
|                      | Nuclear membrane                   |
|                      | Nucleolar precursor body periphery |
|                      | Ooplasm                            |
|                      | Paraspeckles in the nucleus        |
|                      | P-body                             |
|                      | Plasma membrane                    |
|                      | Plastid                            |
|                      | Polysome                           |
|                      | Pronucleus                         |
|                      | Ribosomal partner                  |
|                      | Ribosome-free cytosol              |
|                      | Soma                               |
|                      | Somatodendritic compartment        |

---

Speckle periphery

Synapse

Synaptosome

---
